# Supplementary material for: Interpregnancy weight changes and impact on pregnancy outcome in a cohort of women with a macrosomic first delivery: a prospective longitudinal study
Source: PubMed Central journal article supplement — BMJ Open. 2017 Jun 6;7(5):e016193. doi: 10.1136/bmjopen-2017-016193 (PMC5726057; doi:10.1136/bmjopen-2017-016193), 2017-06-06
Supplement: bmjopen-2017-016193.draft_revisions.pdf [file bmjopen-2017-016193.draft_revisions.pdf]

# BMJ Open

## Interpregnancy weight changes and impact on pregnancy outcome in a cohort of women with a macrosomic first delivery: A Prospective Longitudinal Study.

|                                 |                                                                                                                                                                                                                                                                                                                                                                                                                                                                                                        |
|---------------------------------|--------------------------------------------------------------------------------------------------------------------------------------------------------------------------------------------------------------------------------------------------------------------------------------------------------------------------------------------------------------------------------------------------------------------------------------------------------------------------------------------------------|
| Journal:                        | <i>BMJ Open</i>                                                                                                                                                                                                                                                                                                                                                                                                                                                                                        |
| Manuscript ID                   | bmjopen-2017-016193                                                                                                                                                                                                                                                                                                                                                                                                                                                                                    |
| Article Type:                   | Research                                                                                                                                                                                                                                                                                                                                                                                                                                                                                               |
| Date Submitted by the Author:   | 04-Feb-2017                                                                                                                                                                                                                                                                                                                                                                                                                                                                                            |
| Complete List of Authors:       | Crosby, David; National Maternity Hospital, Obstetrics and Gynaecology; University College Dublin, School of Medicine<br>Walsh, Jennifer; University College Dublin, School of Medicine; National Maternity Hospital, Obstetrics and Gynaecology<br>Segurado, Ricardo; University College Dublin, CSTAR, School of Public Health, Physiotherapy and Population Science<br>McAuliffe, Fionnuala; University College Dublin, School of Medicine; National Maternity Hospital, Obstetrics and Gynaecology |
| <b>Primary Subject Heading</b>: | Obstetrics and gynaecology                                                                                                                                                                                                                                                                                                                                                                                                                                                                             |
| Secondary Subject Heading:      | Obstetrics and gynaecology                                                                                                                                                                                                                                                                                                                                                                                                                                                                             |
| Keywords:                       | Interpregnancy weight change, Body mass index, Fetal macrosomia, tional diabetes mellitus                                                                                                                                                                                                                                                                                                                                                                                                              |
|                                 |                                                                                                                                                                                                                                                                                                                                                                                                                                                                                                        |

SCHOLARONE™  
Manuscripts

Only

1  
2  
3  
4  
5  
6  
7  
8  
9  
10  
11  
12  
13  
14  
15  
16  
17  
18  
19  
20  
21  
22  
23  
24  
25  
26  
27  
28  
29  
30  
31  
32  
33  
34  
35  
36  
37  
38  
39  
40  
41  
42  
43  
44  
45  
46  
47  
48  
49  
50  
51  
52  
53  
54  
55  
56  
57  
58  
59  
60

1 **Title:** Interpregnancy weight changes and impact on pregnancy outcome  
2 in a cohort of women with a macrosomic first delivery: A  
3 Prospective Longitudinal Study.

4  
5 **Authors:** David A Crosby, Jennifer Walsh, Ricardo Segurado, Fionnuala M  
6 McAuliffe

7  
8 **Source:** UCD Obstetrics and Gynaecology, School of Medicine and Medical  
9 Science, University College Dublin, National Maternity Hospital,  
10 Dublin 2, Ireland  
11 National Maternity Hospital Dublin, Ireland (FB)  
12 CSTAR, UCD (RS)

13  
14 **Corresponding author:** Prof Fionnuala M McAuliffe

15  
16 **Telephone:** 0035317163216

17  
18 **Email:** fionnuala.mcauliffe@ucd.ie

19  
20 **Running Title:** Interpregnancy weight gain and impact on pregnancy outcome

1  
2  
3 26 Abstract:  
4

5 27 **Objective:**  
6

7 28 To determine the median interpregnancy maternal weight change between first and  
8  
9 29 second pregnancies, and second and third pregnancies and to assess the impact of this  
10  
11 30 weight change on pregnancy outcome in a cohort of women with a macrosomic first  
12  
13 31 delivery.  
14  
15  
16  
17  
18

19 33 **Study Design:**

20  
21 34 Prospective longitudinal study conducted over three pregnancies from 2007 to 2015.  
22  
23  
24  
25

26 36 **Setting:**

27  
28 37 Tertiary referral maternity hospital, Dublin, Ireland  
29  
30  
31

32 39 **Participants:**

33  
34  
35 40 Women were recruited if their first baby weighed over 4.0kg.  
36  
37  
38

39 42 **Methods:**

40  
41 43 The pregnancy outcomes in the second and third pregnancies were analysed separately.  
42  
43 44 Data were also analysed for both interpregnancy intervals comparing outcomes for  
44  
45 45 those who gained any weight, or more weight than the median, with those who did not.  
46  
47  
48

49  
50 51 **Main Outcome Measures:**  
52

53 48 Recurrent fetal macrosomia  $\geq$  4.0kg  
54

55 49 Gestational diabetes mellitus  
56  
57  
58  
59  
60

1  
2  
3 51 **Results:**  
4

5 52 There were 280 women who delivered a third baby between 2011 and 2015. There  
6  
7 53 were no difference in pregnancy outcomes for the second pregnancy in women who  
8  
9 54 gained interpregnancy weight compared with those who did not and those who gained  
10  
11 55 more interpregnancy weight than the median compared with those who did not. There  
12  
13 56 was a statistically significant increase in birthweight  $\geq 4.0\text{kg}$  (54.0% vs. 39.6%  $p=0.03$ )  
14  
15 57 in those women who gained any weight between the second and third pregnancies. In  
16  
17 58 those women who gained more interpregnancy weight than the median (1.70kg)  
18  
19 59 between a second and third pregnancy, there was a significant increase in the rate of  
20  
21 60 gestational diabetes (6.5% vs 1.4%,  $p=0.03$ ).  
22  
23  
24  
25  
26  
27

28 62 **Conclusions:**  
29

30 63 This longitudinal study demonstrates that within this cohort, maternal interpregnancy  
31  
32 64 weight change between a second and third pregnancy is associated with an increase in  
33  
34 65 birthweight  $\geq 4.0\text{kg}$ . Additionally a gain of more weight than the median (1.70kg) is  
35  
36 66 associated with a higher rate of gestational diabetes.  
37  
38  
39  
40

41 68 **Key words:** Interpregnancy weight change  
42

43 69 Body mass index  
44

45 70 Fetal macrosomia  
46  
47

48 71 Gestational diabetes mellitus  
49  
50  
51  
52  
53  
54  
55  
56  
57  
58  
59  
60

1  
2  
3  
4  
5  
6  
7  
8  
9  
10  
11  
12  
13  
14  
15  
16  
17  
18  
19  
20  
21  
22  
23  
24  
25  
26  
27  
28  
29  
30  
31  
32  
33  
34  
35  
36  
37  
38  
39  
40  
41  
42  
43  
44  
45  
46  
47  
48  
49  
50  
51  
52  
53  
54  
55  
56  
57  
58  
59  
60

## 76 **Article Summary**

### 77 Strengths and Limitations

- 78 • Maternal weight and height were measured at booking visit in each pregnancy <18  
79 weeks gestation and BMI calculated accurately, rather than relying on maternal self-  
80 reporting.
- 81 • Uniform cohort: they delivered a first baby weight >4.0kg and they did not have GDM or  
82 hypertensive disorders in the first pregnancy.
- 83 • Data was prospectively collected by an investigator and accurately recorded into an  
84 anonymised computerised database.
- 85 • Longitudinal study, which has advantages over a cross-sectional study.
- 86 • A potential limitation of this study is that we do not have data on women who attended  
87 elsewhere for subsequent antenatal care.

88  
89  
90  
91  
92  
93  
94  
95  
96  
97  
98  
99  
100  
101  
102  
103  
104  
105  
106  
107  
108  
109  
110

1  
2  
3 111 **Introduction:**  
4 112

5  
6 113 Fetal macrosomia is a common obstetric problem, affecting up to 20% of babies born at  
7  
8 114 term (1, 2). The incidence varies according to the birthweight cut-offs employed, as it is  
9  
10 115 varying defined as an absolute birthweight greater than 4000 g, 4500 g, or as a  
11  
12 116 customised birth weight centile of greater than the 90<sup>th</sup>, 95<sup>th</sup> or 97<sup>th</sup> percentile for the  
13  
14 117 infant's gestational age (3). It is associated with adverse obstetric maternal outcomes  
15  
16 118 and neonatal outcomes, such as hypoglycaemia, hypomagnesaemia and  
17  
18 119 hyperbilirubinaemia (4-6). Furthermore, infants with increased weight and body mass  
19  
20 120 index (BMI) are more likely to be obese in childhood (7), and this is contributing to the  
21  
22 121 burden of obesity on global health (3). Women with a history of birth of a macrosomic  
23  
24 122 infant are at significantly increased risk of delivering another macrosomic infant in a  
25  
26 123 subsequent pregnancy (8), and the risk increases further with a history of two  
27  
28 124 macrosomic infants (9). Maternal weight gain during pregnancy influences fetal  
29  
30 125 birthweight (10), and excessive gestational weight gain is strongly associated with fetal  
31  
32 126 macrosomia (11). Interventions to limit gestational weight gain are, however, limited at  
33  
34 127 best, perhaps due to perceived concerns regarding dietary and lifestyle changes during  
35  
36 128 the prenatal period (12).  
37  
38  
39  
40  
41  
42  
43  
44

45 130 Less attention has been traditionally focused on weight changes, and weight gain in  
46  
47 131 particular, during the interval between pregnancies. Interpregnancy weight gain has,  
48  
49 132 however, been associated with gestational hypertensive disease, gestational diabetes  
50  
51 133 (GDM), caesarean section (CS), fetal macrosomia and even stillbirth (13-16). The  
52  
53 134 postpartum and interval pregnancy time period therefore may represent a specific  
54  
55 135 opportunity for targeted public health education, in women from every BMI category to  
56  
57  
58  
59  
60

1  
2  
3 136 prevent movement into a higher BMI category (17). To date, there are paucity of  
4  
5 137 published longitudinal data on interpregnancy weight changes and the impact on both  
6  
7 138 maternal and neonatal outcomes.  
8  
9  
10 139

11  
12 140 The objective of this longitudinal study was to determine the median interpregnancy  
13  
14 141 maternal weight change between first and second pregnancies, and second and third  
15  
16 142 pregnancies and to assess the impact of this weight change on pregnancy outcome in a  
17  
18 143 cohort of women with a macrosomic first delivery.  
19  
20  
21 144

22  
23 145 **Methods:**

24  
25 146 This is a prospective longitudinal study over three pregnancies. Women were initially  
26  
27 147 recruited to the ROLO study (Randomised cOntrol trial of LOw glycaemic index diet  
28  
29 148 versus no dietary intervention to prevent recurrence of fetal macrosomia) if their first  
30  
31 149 baby weighed over 4.0kg (8). Recruitment to the randomised trial, with institutional  
32  
33 150 ethical approval and maternal written consent, commenced in January 2007 and  
34  
35 151 completed in January 2011. 800 secundigravida women without diabetes, who had  
36  
37 152 previously given birth to a macrosomic baby (> 4.0kg) and were therefore at increased  
38  
39 153 risk of delivering another macrosomic infant (9), were randomised to receive either low  
40  
41 154 glycaemic index (GI) dietary advice or usual antenatal care. Detailed methodology and  
42  
43 155 results of the ROLO study have previously been published (8, 18). In brief; the low GI  
44  
45 156 diet did not impact on birthweight, but maternal benefits were noted in terms of less  
46  
47 157 gestational weight gain (12.2 Kg vs. 13.7Kg,  $p < 0.05$ ) and less glucose intolerance (21%  
48  
49 158 vs. 28%,  $p < 0.05$ ). Low GI dietary advice was given at week 14 of pregnancy and the  
50  
51 159 women in the intervention group were found to have a significantly reduced glycaemic  
52  
53 160 index and glycaemic load following the intervention (8).  
54  
55  
56  
57  
58  
59  
60

1  
2  
3 161 Mothers were then followed prospectively and data collated and anonymised on 280  
4  
5 162 women who delivered two further babies up to 2015. Weight and height were  
6  
7 163 measured accurately at first presentation prior to 18 weeks gestation in each pregnancy  
8  
9 164 and BMI calculated. Relevant descriptive statistics were obtained for the study  
10  
11 165 population.

12  
13  
14 166 The pregnancy outcomes in the second and third pregnancies were analysed separately  
15  
16 167 with respect to the previous interpregnancy period, using absolute weight change. Data  
17  
18 168 were also analysed for both interpregnancy intervals comparing outcomes for those  
19  
20 169 who gained any weight, or those who gained more weight than the median with those  
21  
22 170 who did not, which may be a more convenient definition for clinical practice. The  
23  
24 171 pregnancy outcomes analysed were CS, GDM, recurrent fetal macrosomia, gestational  
25  
26 172 hypertensive disease, neonatal intensive care unit (NICU) admission and stillbirth. We  
27  
28 173 used the Mann-Whitney-U test to evaluate differences in continuous variables between  
29  
30 174 the groups or over time and  $\chi^2$  tests to compare categorical variables between groups.  
31  
32 175 We set statistical significance at  $P < 0.05$  and used SPSS version 23.0 for statistical  
33  
34 176 analysis.

35  
36  
37  
38  
39 177

#### 40 41 178 **Results:**

42  
43 179 Of the initial 800 women recruited to the ROLO study, 280 (35.0%) women delivered a  
44  
45 180 third baby between 2011 and 2015. Of these, the median maternal weight in the first  
46  
47 181 pregnancy was 68.8kg (IQR 16.5) and the median BMI was 24.9kg/m<sup>2</sup> (IQR 4.7). In total,  
48  
49 182 11.4% (n=32) of the cohort were obese in the first trimester of the first pregnancy.  
50  
51 183 Table 1 details the demographic data for the cohort in the first trimester of the first,  
52  
53 184 second and third pregnancies respectively.

54  
55  
56  
57 185  
58  
59  
60



1  
2  
3 186 Overall, 72.9% (n=204) gained weight between the first and second pregnancy within a  
4  
5 187 median interpregnancy interval of 24 months (IQR 12.0) and the overall median weight  
6  
7 188 change was 2.60kg (IQR 3.5). 67.5% (n=189) gained weight between the second and  
8  
9 189 third pregnancy within a median interpregnancy interval of 36.0 months (IQR 24.0),  
10  
11 190 and the overall median weight change was 1.70kg (IQR 5.3). This resulted in a median  
12  
13 191 weight gain from first to third pregnancy of 4.30kg (IQR 7.5). Overall the rate of obesity  
14  
15 192 rose from 11.4% in first pregnancy to 22.1% by the beginning of the third pregnancy.  
16  
17  
18  
19

20  
21 194 There were no difference in pregnancy outcomes for the second pregnancy (gestational  
22  
23 195 hypertensive disease, GDM, CS, recurrent fetal macrosomia  $\geq$  4kg, NICU admission and  
24  
25 196 stillbirth) in women who gained interpregnancy weight compared with those who did  
26  
27 197 not and those who gained more interpregnancy weight than the median compared with  
28  
29 198 those who did not.  
30  
31

32  
33 199  
34  
35 200 There was a statistically significant increase in birthweights  $\geq$  4.0kg (54.0% vs. 39.6%  
36  
37 201  $p=0.03$ ) in those women who gained weight between the second and third pregnancies.

38  
39 202 In those women who gained more interpregnancy weight than the median (1.70kg)  
40  
41 203 between a second and third pregnancy, there was a significant increase in the rate of  
42  
43 204 gestational diabetes (6.5% vs. 1.4%,  $p=0.03$ ). There were no differences in gestational  
44  
45 205 hypertensive disease, CS, NICU admission and stillbirth (Table 3).  
46  
47

48 206  
49  
50 207 To examine the effect of cumulative weight gain over both interpregnancy intervals, and  
51  
52 208 to control for the effect of maternal age and BMI less than 18 weeks gestation in the  
53  
54 209 index pregnancy on the above results, logistic regression models to predict a  
55  
56 210 birthweight  $\geq$  4.0kg were run. Weight gain between the first and second, second and  
57  
58  
59  
60

1  
2  
3 211 third and overall between first and third pregnancies had broadly similar effects, with a  
4  
5 212 2-3% higher odds of a high birthweight per kilogram gain, which increased to 3-5%  
6  
7 213 when adjusting for maternal age and BMI. Statistical significance was marginal, but  
8  
9 214 present for weight gain in the earlier interval and between first and third pregnancies.  
10  
11 215

## 216 **Discussion:**

### 217 218 Main Findings

219 This longitudinal study found that women who delivered a macrosomic infant  $\geq 4.0$ kg in  
20  
21 220 their first pregnancy without gestational diabetes gained a median of 2.60kg between a  
22  
23 221 first and second pregnancy and a median of 1.70kg between a second and third  
24  
25 222 pregnancy resulting in a median 4.30kg weight gain from first to third pregnancy. This  
26  
27 223 resulted in increase in obesity rates from 11.4% in first pregnancy to 22.1% in third  
28  
29 224 pregnancy, highlighting the central role pregnancy has in weight gain across the life  
30  
31 225 course. The interpregnancy weight gain between first and second pregnancies did not  
32  
33 226 appear to impact on pregnancy outcome, however interpregnancy weight gain between  
34  
35 227 second and third pregnancies was associated with an increased rate of recurrent fetal  
36  
37 228 macrosomia  $\geq 4.0$ kg. Additionally those with a weight gain of more than the median  
38  
39 229 ( $\geq 1.70$ kg) between second and third pregnancies was associated with increased  
40  
41 230 incidence of GDM.  
42  
43  
44  
45  
46

### 231 232 Interpretation

233 One possible explanation for the lack of associations in second pregnancy may arise due  
234  
235 234 to the Hawthorne effect of trial participation in both the intervention and control arms.  
236  
235 235 Another more likely hypothesis could be that weight gain may be cumulative. The  
236  
236 236 median weights at booking visit in the first, second and third pregnancies were 68.8kg,  
237  
238  
239  
240  
241  
242  
243  
244  
245  
246  
247  
248  
249  
250  
251  
252  
253  
254  
255  
256  
257  
258  
259  
260

1  
2  
3 237 71.3kg and 73.1kg respectively. Is weight gain cumulative so that it is only over a  
4  
5 238 certain level that effects on birthweight and GDM are noted? There are a paucity of  
6  
7 239 longitudinal studies on postpartum weight changes, because these studies are  
8  
9 240 challenging to conduct (19). This longitudinal study adds to the evidence that  
10  
11 241 interpregnancy weight gain causes GDM and macrosomic babies. Many studies relating  
12  
13 242 to interpregnancy weight changes are cross sectional and retrospective in nature.  
14  
15 243 Furthermore, many of these studies use self-reported maternal weight, which can be  
16  
17 244 unreliable and leads to BMI miscategorization (20). High postpartum weight retention  
18  
19 245 is an important contributor to long-term maternal obesity, which has detrimental  
20  
21 246 effects on long-term maternal health (21).

#### 247 Strengths and Limitations in relation to other studies

248 Bogaerts et al. found that in a population of 7,897 women in Belgium, there was an  
249 increase rate of GDM (aOR 2.25, 95% CI 1.33-3.78; P=0.002) in those who had  
250 interpregnancy weight retention of 2 or more BMI units. However, this study used self-  
251 reported prepregnancy weight and no prior information on hypertension and GDM  
252 available (15). A large Swedish retrospective epidemiological study of 151,025 women  
253 who had their first two consecutive births between 1992 and 2001 found that those  
254 who gained 3 or more BMI units between pregnancies compared with those women  
255 whose BMI changed between -1.0 and 0.9 units had an adjusted odds ratio of GDM of  
256 2.09 (1.68-2.61) (13). Wallace et al. (22) conducted a retrospective cohort study of  
257 12,740 women in Aberdeen, Scotland who delivered their first and second children  
258 between 1986 and 2007. Weight gain of greater than three BMI units was associated  
259 with an increase in large for gestational age infants. Jain et al. (23) analysed a  
260 population based historical cohort of 10,444 obese women in Missouri who delivered  
261 their first infant between 1998-2005. Interpregnancy weight gain was associated with

1  
2  
3 262 an increased risk of a LGA infant (aOR 1.37; 95% CI, 1.21-1.54). These studies are  
4  
5 263 retrospective. Our study is a prospective longitudinal illustrating that interpregnancy  
6  
7 264 weight gain is associated with recurrent fetal macrosomia in a unique population of  
8  
9 265 women who delivered a macrosomic baby  $\geq 4.0$  kg in their index pregnancy, and that  
10  
11 266 interpregnancy weight gain of greater than the median is associated with an increased  
12  
13  
14 267 rate of GDM.  
15

16  
17 268

18  
19 269 The interpregnancy interval is an important time for diet and lifestyle intervention in  
20  
21 270 women who have delivered a macrosomic infant in their first pregnancy in the  
22  
23 271 prevention of recurrent macrosomia and the development of GDM.  
24

#### 25 272 Strengths and Limitations

26  
27  
28 273 This longitudinal study has strengths. Maternal weight and height were measured at  
29  
30 274 booking visit in each pregnancy  $<18$  weeks gestation and BMI calculated accurately,  
31  
32 275 rather than relying on maternal self-reporting. Furthermore, this cohort of women was  
33  
34 276 uniform in that they delivered a first baby weight  $>4.0$ kg and they did not have GDM or  
35  
36 277 hypertensive disorders in the first pregnancy. Data was prospectively collected by an  
37  
38 278 investigator and accurately recorded into an anonymised computerised database.  
39  
40  
41 279 Finally, this longitudinal study has advantages over a cross-sectional study.  
42

43  
44 280

45  
46 281 A potential limitation of this study is that we do not have data on women who attended  
47  
48 282 elsewhere for subsequent antenatal care. Another potential limitation is that the  
49  
50 283 interpregnancy interval varied between subjects within this study. Finally, this study  
51  
52 284 applies to women who delivered a first baby  $>4$ kg, which applies to approximately 15%  
53  
54  
55 285 of our overall primiparous population.  
56

57  
58 286  
59  
60

1  
2  
3 287 **Conclusions:**  
4

5 288 This longitudinal study demonstrates that within this cohort maternal interpregnancy  
6  
7 289 weight change between a second and third pregnancy is associated with an increase in  
8  
9 290 birthweight  $\geq 4.0$ kg. Additionally a gain of more weight than the median (1.70kg) is  
10  
11 291 associated with a higher rate of gestational diabetes. It is important to identify ways for  
12  
13 292 women to maintain a normal weight and BMI throughout her life, particularly between  
14  
15 293 pregnancies. Obstetricians should consider postnatal advice on interval pregnancy  
16  
17 294 weight gain in order to reduce rates of macrosomia and gestational diabetes in future  
18  
19 295 pregnancy in at risk women.  
20  
21  
22

23 296

24  
25 297 **Acknowledgments**  
26

27  
28 298 Nil of note  
29

30 299

31  
32 300 **Contribution to Authorship**  
33

34  
35 301 FMMcA conceived and designed the study. JW contributed to the study design and  
36  
37 302 manuscript preparation. DAC performed the analysis and wrote the manuscript. RS  
38  
39 303 performed analysis. All of the authors reviewed and revised the final version of the  
40  
41 304 manuscript. FMMcA is the guarantor.  
42

43 305

44  
45  
46 306 **Ethical Approval**  
47

48 307 Not applicable  
49

50 308

51  
52 309 **Funding**  
53

54  
55 310 This research received no specific grant from any funding agency in the public,  
56  
57 311 commercial or not-for-profit sectors.  
58  
59  
60

1  
2  
3  
4  
5  
6  
7  
8  
9  
10  
11  
12  
13  
14  
15  
16  
17  
18  
19  
20  
21  
22  
23  
24  
25  
26  
27  
28  
29  
30  
31  
32  
33  
34  
35  
36  
37  
38  
39  
40  
41  
42  
43  
44  
45  
46  
47  
48  
49  
50  
51  
52  
53  
54  
55  
56  
57  
58  
59  
60

312 **Competing Interests**

313 We have read and understood BMJ policy on declaration of interests and declare that  
314 we have no competing interests.

315  
316  
317  
318  
319  
320  
321  
322  
323  
324  
325  
326  
327  
328  
329  
330  
331  
332  
333  
334  
335  
336

For peer review only

337 **References**

- 338 (1) Ørskou J, Kesmodel U, Henriksen TB, Secher NJ. An increasing proportion of  
339 infants weigh more than 4000 grams at birth. *Acta Obstet Gynecol Scand*. 2001  
340 Oct; 80 (10): 931-6.
- 341 (2) National Maternity Hospital Clinical Report for the Year 2014.
- 342 (3) Walsh JM, McAuliffe FM. Prediction and prevention of the macrosomic fetus. *Eur*  
343 *J Obstet Gynecol Reprod Biol*. 2012 Jun;162(2):125-30
- 344 (4) Boulet SL, Alexander GR, Salihu HM, Pass M. *Am J Obstet Gynecol*. Macrosomic  
345 births in the united states: determinants, outcomes, and proposed grades of risk.  
346 2003 May;188(5):1372-8.
- 347 (5) Nold JL, Georgieff MK. *Pediatr Clin North Am*. Infants of diabetic mothers. 2004  
348 Jun;51(3):619-37
- 349 (6) Weissmann-Brenner A1, Simchen MJ, Zilberberg E, Kalter A, Weisz B, Achiron R  
350 et al. Maternal and neonatal outcomes of large for gestational age pregnancies.  
351 *Acta Obstet Gynecol Scand*. 2012 Jul;91(7):844-9.
- 352 (7) Boney CM, Verma A, Tucker R, Vohr BR. Metabolic syndrome in childhood:  
353 association with birth weight, maternal obesity, and gestational diabetes  
354 mellitus. *Pediatrics*. 2005 Mar;115(3):e290-6
- 355 (8) Walsh JM, McGowan CA, Mahony R, Foley ME, McAuliffe FM. Low glycaemic index  
356 diet in pregnancy to prevent macrosomia (ROLO study): randomised control  
357 trial. *BMJ*. 2012 Aug 30;345:e5605
- 358 (9) Walsh CA, Mahony RT, Foley ME, Daly L, O'Herlihy C. Recurrence of fetal  
359 macrosomia in non-diabetic pregnancies. *J Obstet Gynaecol*. 2007  
360 May;27(4):374-8.

- 1  
2  
3 361 (10) Abrams BF, Laros RK Jr. Prepregnancy weight, weight gain, and birth  
4 weight. *Am J Obstet Gynecol*. 1986 Mar;154(3):503-9.  
5 362  
6  
7 363 (11) Godoy AC, Nascimento SL, Surita FG. A systematic review and meta-  
8 analysis of gestational weight gain recommendations and related outcomes in  
9 Brazil. *Clinics (Sao Paulo)*. 2015 Nov;70(11):758-64.  
10 364  
11  
12 365 (12) Sagedal LR, Øverby NC, Bere E, Torstveit MK, Lohne-Seiler H, Småstuen M  
13 et al. Lifestyle intervention to limit gestational weight gain: the Norwegian Fit for  
14 Delivery randomised controlled trial. *BJOG*. 2016 Jan 14. doi: 10.1111/1471-  
15 366 0528.13862. [Epub ahead of print]  
16 367  
17 368  
18 369 (13) Villamor E, Cnattingius S. Interpregnancy weight change and risk of  
19 adverse pregnancy outcomes: a population-based study. *Lancet*. 2006 Sep  
20 370 30;368(9542):1164-70.  
21 371  
22 372  
23 373 (14) Paramsothy P, Lin YS, Kernic MA, Foster-Schubert KE. Interpregnancy  
24 weight gain and cesarean delivery risk in women with a history of gestational  
25 374 diabetes. *Obstet Gynecol*. 2009 Apr;113(4):817-23.  
26 375  
27 376 (15) Bogaerts A, Van den Bergh BR, Ameye L, Witters I, Martens E, Timmerman  
28 D, Devlieger R. Interpregnancy weight change and risk for adverse perinatal  
29 377 outcome. *Obstet Gynecol*. 2013 Nov;122(5):999-1009  
30 378  
31 379 (16) Cnattingius S, Villamor E. Weight change between successive pregnancies  
32 and risks of stillbirth and infant mortality: a nationwide cohort study. *Lancet*.  
33 380 2016 Feb 6;387(10018):558-65.  
34 381  
35 382 (17) Walsh JM, Mahony RM, Canty G, Foley ME, McAuliffe FM. Identification of  
36 those most likely to benefit from a low-glycaemic index dietary intervention in  
37 383 pregnancy. *Br J Nutr*. 2014 Aug 28;112(4):583-9.  
38 384  
39  
40  
41  
42  
43  
44  
45  
46  
47  
48  
49  
50  
51  
52  
53  
54  
55  
56  
57  
58  
59  
60



- 1  
2  
3 385 (18) Walsh JM, McGowan CA, Mahony R, Foley ME, McAuliffe FM. Low  
4  
5 386 glycaemic index diet in pregnancy to prevent macrosomia (ROLO study):  
6  
7 387 randomised control trial. *Br Med J*. 2012;345.  
8  
9  
10 388 (19) O'Higgins AC, Doolan A, Mullaney L, Daly N, McCartney D, Turner MJ. The  
11  
12 389 relationship between gestational weight gain and fetal growth: time to take  
13  
14 390 stock? *J Perinat Med* 2013;21:1-7  
15  
16  
17 391 (20) Turner MJ. The measurement of maternal obesity: can we do better? *Clin*  
18  
19 392 *Obes* 2011;1:127-129  
20  
21 393 (21) Gunderson EP. Childbearing and obesity in women: weight before, during,  
22  
23 394 and after pregnancy. *Obstet Gynecol Clin North Am* 2009;36(2):317-332.  
24  
25  
26 395 (22) Wallace JM, Bhattacharya S, Campbell DM, Horgan GW. Inter-pregnancy  
27  
28 396 weight change impacts placental weight and is associated with the risk of  
29  
30 397 adverse pregnancy outcomes in the second pregnancy. *BMC Pregnancy*  
31  
32 398 *Childbirth*. 2014 Jan 22;14:40.  
33  
34  
35 399 (23) Jain AP, Gavard JA, Rice JJ, Catanzaro RB, Artal R, Hopkins SA. The impact  
36  
37 400 of interpregnancy weight change on birthweight in obese women. *Am J Obstet*  
38  
39 401 *Gynecol*. 2013 Mar;208(3):205  
40  
41 402  
42  
43 403  
44  
45 404  
46  
47 405  
48  
49 406  
50  
51 407  
52  
53 408  
54  
55 409  
56  
57  
58  
59  
60

1  
2  
3 410 **Table 1:** Demographics of the cohort at in the first trimester of the first, second and  
4  
5 411 third pregnancies respectively (n=280)  
6  
7  
8 412

|                                | Pregnancy 1  | Pregnancy 2  | Pregnancy 3  |
|--------------------------------|--------------|--------------|--------------|
| Maternal Age (years)           | 29.0 (8.1)   | 31.8 (5.5)   | 34.8 (5.8)   |
| Maternal Weight (kg)           | 68.8 (16.5)  | 71.4 (17.5)  | 73.1 (19.4)  |
| BMI (kg/m <sup>2</sup> )       | 24.9 (4.7)   | 25.7 (5.4)   | 26.0 (5.7)   |
| Birthweight (kg)               | 4.2 (0.26)   | 4.1 (0.61)   | 4.0 (0.69)   |
| Gestational Age (Days)         | 288 (10.0)   | 283 (11.0)   | 280 (13.8)   |
| Obese (≥ 30kg/m <sup>2</sup> ) | 11.4% (n=32) | 20.0% (n=56) | 22.1% (n=62) |

27 413  
28 414  
29 415  
30 416  
31 417  
32 418  
33 419  
34 420  
35 421  
36 422  
37 423  
38 424  
39 425  
40 426  
41 427  
42 428  
43 429  
44 430  
45 431  
46 432  
47 433  
48 434  
49 435  
50 436  
51 437  
52 438  
53 439  
54 440  
55  
56  
57  
58  
59  
60

All values are median with interquartile ranges in hypotheses, except for obesity (demonstrated in absolute numbers and percentages). Maternal weight and body mass index (BMI) were calculated at ≤ 18 weeks gestation.

441 **Table 2. Effect of weight gain on odds of birthweight  $\geq 4$ kg unadjusted and**  
 442 **adjusted for maternal age and BMI calculated at less than 18 weeks gestation in**  
 443 **the index pregnancy**

|                                   | Unadjusted |            |         | Adjusted for maternal age and BMI |            |         |
|-----------------------------------|------------|------------|---------|-----------------------------------|------------|---------|
|                                   | OR         | 95% CI     | p-value | OR                                | 95% CI     | p-value |
| Weight gain from pregnancy 1 to 2 | 1.03       | 0.99, 1.07 | 0.169   | 1.05                              | 1.01, 1.10 | 0.024   |
| Weight gain from pregnancy 2 to 3 | 1.02       | 0.98, 1.06 | 0.243   | 1.03                              | 0.99, 1.08 | 0.107   |
| Weight gain from pregnancy 1 to 3 | 1.03       | 1.00, 1.06 | 0.093   | 1.04                              | 1.01, 1.08 | 0.013   |

444

445

446

447

448

449

450

451

452

453

454

455

456

1  
2  
3 457 Table 3:  
4

5 458 Pregnancy outcomes for the third pregnancy based on those who gained inter-  
6 pregnancy weight compared with those who did not and those who gained more inter-  
7 pregnancy weight than the median compared with those who did not.  
8  
9 461  
10 462

|                      | <b>Gained interpregnancy weight n=189</b>                | <b>Did not gain interpregnancy weight n=91</b>        | <b>P value</b> |
|----------------------|----------------------------------------------------------|-------------------------------------------------------|----------------|
| CS overall           | 41 (21.7%)                                               | 21 (23.1%)                                            | NS             |
| GDM                  | 9 (4.8%)                                                 | 2 (2.2%)                                              | NS             |
| BW ≥4kg              | 102 (54.0%)                                              | 36 (39.6%)                                            | P=0.03         |
| Hypertensive Disease | 5 (2.6%)                                                 | 2 (2.2%)                                              | NS             |
| NICU                 | 4 (2.1%)                                                 | 2 (2.2%)                                              | NS             |
| Stillbirth           | 1 (0.5%)                                                 | 1 (1.1%)                                              | NS             |
|                      | <b>Gained &gt; 1.70kg inter-pregnancy weight (n=139)</b> | <b>Gained ≤ 1.70kg inter-pregnancy weight (n=141)</b> | <b>P value</b> |
| CS overall           | 28 (20.1%)                                               | 34 (24.1%)                                            | NS             |
| GDM                  | 9 (6.5%)                                                 | 2 (1.4%)                                              | 0.03           |
| BW ≥4kg              | 75 (54.0%)                                               | 63 (44.7%)                                            | NS             |
| Hypertensive Disease | 4 (2.9%)                                                 | 3 (2.1%)                                              | NS             |
| NICU                 | 4 (2.9%)                                                 | 2 (1.4%)                                              | NS             |
| Stillbirth           | 0 (0%)                                                   | 2 (1.4%)                                              | NS             |

35 463

36 464  
37  
38  
39  
40  
41  
42  
43  
44  
45  
46  
47  
48  
49  
50  
51  
52  
53  
54  
55  
56  
57  
58  
59  
60

STROBE 2007 (v4) Statement—Checklist of items that should be included in reports of *cross-sectional studies*

| Section/Topic                | Item # | Recommendation                                                                                                                                                                       | Reported on page # |
|------------------------------|--------|--------------------------------------------------------------------------------------------------------------------------------------------------------------------------------------|--------------------|
| Title and abstract           | 1      | (a) Indicate the study's design with a commonly used term in the title or the abstract                                                                                               | 2                  |
|                              |        | (b) Provide in the abstract an informative and balanced summary of what was done and what was found                                                                                  | 3                  |
| <b>Introduction</b>          |        |                                                                                                                                                                                      |                    |
| Background/rationale         | 2      | Explain the scientific background and rationale for the investigation being reported                                                                                                 | 5                  |
| Objectives                   | 3      | State specific objectives, including any prespecified hypotheses                                                                                                                     | 6                  |
| <b>Methods</b>               |        |                                                                                                                                                                                      |                    |
| Study design                 | 4      | Present key elements of study design early in the paper                                                                                                                              | 6                  |
| Setting                      | 5      | Describe the setting, locations, and relevant dates, including periods of recruitment, exposure, follow-up, and data collection                                                      | 7                  |
| Participants                 | 6      | (a) Give the eligibility criteria, and the sources and methods of selection of participants                                                                                          | 6                  |
| Variables                    | 7      | Clearly define all outcomes, exposures, predictors, potential confounders, and effect modifiers. Give diagnostic criteria, if applicable                                             | 7                  |
| Data sources/<br>measurement | 8*     | For each variable of interest, give sources of data and details of methods of assessment (measurement). Describe comparability of assessment methods if there is more than one group | 7                  |
| Bias                         | 9      | Describe any efforts to address potential sources of bias                                                                                                                            | N/A                |
| Study size                   | 10     | Explain how the study size was arrived at                                                                                                                                            |                    |
| Quantitative variables       | 11     | Explain how quantitative variables were handled in the analyses. If applicable, describe which groupings were chosen and why                                                         | 7                  |
| Statistical methods          | 12     | (a) Describe all statistical methods, including those used to control for confounding                                                                                                | 7                  |
|                              |        | (b) Describe any methods used to examine subgroups and interactions                                                                                                                  | N/A                |
|                              |        | (c) Explain how missing data were addressed                                                                                                                                          | N/A                |
|                              |        | (d) If applicable, describe analytical methods taking account of sampling strategy                                                                                                   | N/A                |
|                              |        | (e) Describe any sensitivity analyses                                                                                                                                                | N/A                |
| <b>Results</b>               |        |                                                                                                                                                                                      |                    |

|                          |     |                                                                                                                                                                                                              |       |
|--------------------------|-----|--------------------------------------------------------------------------------------------------------------------------------------------------------------------------------------------------------------|-------|
| Participants             | 13* | (a) Report numbers of individuals at each stage of study—eg numbers potentially eligible, examined for eligibility, confirmed eligible, included in the study, completing follow-up, and analysed            | 7     |
|                          |     | (b) Give reasons for non-participation at each stage                                                                                                                                                         | N/A   |
|                          |     | (c) Consider use of a flow diagram                                                                                                                                                                           | N/A   |
| Descriptive data         | 14* | (a) Give characteristics of study participants (eg demographic, clinical, social) and information on exposures and potential confounders                                                                     | 7     |
|                          |     | (b) Indicate number of participants with missing data for each variable of interest                                                                                                                          | N/A   |
| Outcome data             | 15* | Report numbers of outcome events or summary measures                                                                                                                                                         | 8     |
| Main results             | 16  | (a) Give unadjusted estimates and, if applicable, confounder-adjusted estimates and their precision (eg, 95% confidence interval). Make clear which confounders were adjusted for and why they were included |       |
|                          |     | (b) Report category boundaries when continuous variables were categorized                                                                                                                                    | 8-9   |
|                          |     | (c) If relevant, consider translating estimates of relative risk into absolute risk for a meaningful time period                                                                                             | N/A   |
| Other analyses           | 17  | Report other analyses done—eg analyses of subgroups and interactions, and sensitivity analyses                                                                                                               | N/A   |
| <b>Discussion</b>        |     |                                                                                                                                                                                                              |       |
| Key results              | 18  | Summarise key results with reference to study objectives                                                                                                                                                     | 9     |
| Limitations              | 19  | Discuss limitations of the study, taking into account sources of potential bias or imprecision. Discuss both direction and magnitude of any potential bias                                                   | 10-11 |
| Interpretation           | 20  | Give a cautious overall interpretation of results considering objectives, limitations, multiplicity of analyses, results from similar studies, and other relevant evidence                                   | 12    |
| Generalisability         | 21  | Discuss the generalisability (external validity) of the study results                                                                                                                                        | 12    |
| <b>Other information</b> |     |                                                                                                                                                                                                              |       |
| Funding                  | 22  | Give the source of funding and the role of the funders for the present study and, if applicable, for the original study on which the present article is based                                                | N/A   |

\*Give information separately for cases and controls in case-control studies and, if applicable, for exposed and unexposed groups in cohort and cross-sectional studies.

**Note:** An Explanation and Elaboration article discusses each checklist item and gives methodological background and published examples of transparent reporting. The STROBE checklist is best used in conjunction with this article (freely available on the Web sites of PLoS Medicine at <http://www.plosmedicine.org/>, Annals of Internal Medicine at <http://www.annals.org/>, and Epidemiology at <http://www.epidem.com/>). Information on the STROBE Initiative is available at [www.strobe-statement.org](http://www.strobe-statement.org).

# BMJ Open

## Interpregnancy weight changes and impact on pregnancy outcome in a cohort of women with a macrosomic first delivery: A Prospective Longitudinal Study.

|                                 |                                                                                                                                                                                                                                                                                                                                                                                                                                                                                                        |
|---------------------------------|--------------------------------------------------------------------------------------------------------------------------------------------------------------------------------------------------------------------------------------------------------------------------------------------------------------------------------------------------------------------------------------------------------------------------------------------------------------------------------------------------------|
| Journal:                        | <i>BMJ Open</i>                                                                                                                                                                                                                                                                                                                                                                                                                                                                                        |
| Manuscript ID                   | bmjopen-2017-016193.R1                                                                                                                                                                                                                                                                                                                                                                                                                                                                                 |
| Article Type:                   | Research                                                                                                                                                                                                                                                                                                                                                                                                                                                                                               |
| Date Submitted by the Author:   | 10-Mar-2017                                                                                                                                                                                                                                                                                                                                                                                                                                                                                            |
| Complete List of Authors:       | Crosby, David; National Maternity Hospital, Obstetrics and Gynaecology; University College Dublin, School of Medicine<br>Walsh, Jennifer; University College Dublin, School of Medicine; National Maternity Hospital, Obstetrics and Gynaecology<br>Segurado, Ricardo; University College Dublin, CSTAR, School of Public Health, Physiotherapy and Population Science<br>McAuliffe, Fionnuala; University College Dublin, School of Medicine; National Maternity Hospital, Obstetrics and Gynaecology |
| <b>Primary Subject Heading</b>: | Obstetrics and gynaecology                                                                                                                                                                                                                                                                                                                                                                                                                                                                             |
| Secondary Subject Heading:      | Obstetrics and gynaecology                                                                                                                                                                                                                                                                                                                                                                                                                                                                             |
| Keywords:                       | Interpregnancy weight change, Body mass index, Fetal macrosomia, tional diabetes mellitus                                                                                                                                                                                                                                                                                                                                                                                                              |
|                                 |                                                                                                                                                                                                                                                                                                                                                                                                                                                                                                        |

SCHOLARONE™  
Manuscripts

Only

1  
2  
3  
4  
5  
6  
7  
8  
9  
10  
11  
12  
13  
14  
15  
16  
17  
18  
19  
20  
21  
22  
23  
24  
25  
26  
27  
28  
29  
30  
31  
32  
33  
34  
35  
36  
37  
38  
39  
40  
41  
42  
43  
44  
45  
46  
47  
48  
49  
50  
51  
52  
53  
54  
55  
56  
57  
58  
59  
60

1 **Title:** Interpregnancy weight changes and impact on pregnancy outcome  
2 in a cohort of women with a macrosomic first delivery: A  
3 Prospective Longitudinal Study.

4  
5 **Authors:** David A Crosby, Jennifer Walsh, Ricardo Segurado, Fionnuala M  
6 McAuliffe

7  
8 **Source:** UCD Obstetrics and Gynaecology, School of Medicine and Medical  
9 Science, University College Dublin, National Maternity Hospital,  
10 Dublin 2, Ireland  
11 National Maternity Hospital Dublin, Ireland (FB)  
12 CSTAR, UCD (RS)

13  
14 **Corresponding author:** Prof Fionnuala M McAuliffe

15  
16 **Telephone:** 0035317163216

17  
18 **Email:** fionnuala.mcauliffe@ucd.ie

19  
20 **Running Title:** Interpregnancy weight gain and impact on pregnancy outcome



1  
2  
3 26 Abstract:  
4

5 27 **Objective:**  
6

7 28 To determine the median interpregnancy maternal weight change between first and  
8  
9 29 second pregnancies, and second and third pregnancies and to assess the impact of this  
10  
11 30 weight change on pregnancy outcome in a cohort of women with a macrosomic first  
12  
13 31 delivery.  
14  
15  
16  
17  
18

19 33 **Study Design:**

20  
21 34 Prospective longitudinal study conducted over three pregnancies from 2007 to 2015.  
22  
23  
24  
25

26 36 **Setting:**

27  
28 37 Tertiary referral maternity hospital, Dublin, Ireland  
29  
30  
31

32 39 **Participants:**

33  
34  
35 40 Women were recruited if their first baby weighed over 4.0kg.  
36  
37  
38

39 42 **Methods:**

40  
41 43 The pregnancy outcomes in the second and third pregnancies were analysed separately.  
42  
43 44 Data were also analysed for both interpregnancy intervals comparing outcomes for  
44  
45 45 those who gained any weight, or more weight than the median, with those who did not.  
46  
47  
48

49  
50 51 **Main Outcome Measures:**  
52

53 48 Recurrent fetal macrosomia  $\geq$  4.0kg  
54

55 49 Gestational diabetes mellitus  
56  
57  
58  
59  
60

1  
2  
3 51 **Results:**  
4

5 52 There were 280 women who delivered a third baby between 2011 and 2015. There  
6  
7 53 were no difference in pregnancy outcomes for the second pregnancy in women who  
8  
9 54 gained interpregnancy weight compared with those who did not and those who gained  
10  
11 55 more interpregnancy weight than the median compared with those who did not. There  
12  
13 56 was a statistically significant increase in birthweight  $\geq 4.0\text{kg}$  (54.0% vs. 39.6%  $p=0.03$ )  
14  
15 57 in those women who gained any weight between the second and third pregnancies. In  
16  
17 58 those women who gained more interpregnancy weight than the median (1.70kg)  
18  
19 59 between a second and third pregnancy, there was a significant increase in the rate of  
20  
21 60 gestational diabetes (6.5% vs 1.4%,  $p=0.03$ ).  
22  
23  
24  
25  
26  
27

28 62 **Conclusions:**  
29

30 63 This longitudinal study demonstrates that within this cohort, maternal interpregnancy  
31  
32 64 weight change between a second and third pregnancy is associated with an increase in  
33  
34 65 birthweight  $\geq 4.0\text{kg}$ . Additionally a gain of more weight than the median (1.70kg) is  
35  
36 66 associated with a higher rate of gestational diabetes.  
37  
38  
39  
40

41 68 **Key words:** Interpregnancy weight change  
42

43 69 Body mass index  
44

45 70 Fetal macrosomia  
46  
47

48 71 Gestational diabetes mellitus  
49  
50  
51  
52  
53  
54  
55  
56  
57  
58  
59  
60

1  
2  
3 76 **Article Summary**  
4

5 77 Strengths and Limitations  
6

- 7  
8 • Maternal weight and height were measured at booking visit in each pregnancy <18  
9  
10 weeks gestation and BMI calculated accurately, rather than relying on maternal self-  
11  
12 reporting.  
13  
14 • Uniform cohort: they delivered a first baby weight >4.0kg and they did not have GDM or  
15  
16 hypertensive disorders in the first pregnancy.  
17  
18 • Data was prospectively collected by an investigator and accurately recorded into an  
19  
20 anonymised computerised database.  
21  
22 • Longitudinal study, which has advantages over a cross-sectional study.  
23  
24 • A potential limitation of this study is that we do not have data on women who attended  
25  
26 elsewhere for subsequent antenatal care.  
27

28  
29 88 **Data Sharing Statement**  
30

31 89 There is no additional unpublished data from this study. All co-authors can access this data.  
32 90 Anonymous data can be obtained by contacting the corresponding author.  
33  
34 91

35 92  
36 93  
37 94  
38 95  
39 96  
40 97  
41 98  
42 99  
43 100  
44 101  
45 102  
46 103  
47 104  
48 105  
49 106  
50 107  
51 108  
52 109  
53 110  
54 111  
55  
56  
57  
58  
59  
60

1  
2  
3  
4  
5  
6  
7  
8  
9  
10  
11  
12  
13  
14  
15  
16  
17  
18  
19  
20  
21  
22  
23  
24  
25  
26  
27  
28  
29  
30  
31  
32  
33  
34  
35  
36  
37  
38  
39  
40  
41  
42  
43  
44  
45  
46  
47  
48  
49  
50  
51  
52  
53  
54  
55  
56  
57  
58  
59  
60**112 Introduction:**

113

114 Fetal macrosomia is a common obstetric problem, affecting up to 20% of babies born at  
115 term (1, 2). The incidence varies according to the birthweight cut-offs employed, as it is  
116 varyingly defined as an absolute birthweight greater than 4000 g, 4500 g, or as a  
117 customised birth weight centile of greater than the 90<sup>th</sup>, 95<sup>th</sup> or 97<sup>th</sup> percentile for the  
118 infant's gestational age (3). It is associated with adverse obstetric maternal outcomes  
119 and neonatal outcomes, such as hypoglycaemia, hypomagnesaemia and  
120 hyperbilirubinaemia (4-6). Furthermore, infants with increased weight and body mass  
121 index (BMI) are more likely to be obese in childhood (7), and this is contributing to the  
122 burden of obesity on global health (3). Women with a history of birth of a macrosomic  
123 infant are at significantly increased risk of delivering another macrosomic infant in a  
124 subsequent pregnancy (8), and the risk increases further with a history of two  
125 macrosomic infants (9). Maternal weight gain during pregnancy influences fetal  
126 birthweight (10), and excessive gestational weight gain is strongly associated with fetal  
127 macrosomia (11). Interventions to limit gestational weight gain are, however, limited at  
128 best, perhaps due to perceived concerns regarding dietary and lifestyle changes during  
129 the prenatal period (12).

130

131 Less attention has been traditionally focused on weight changes, and weight gain in  
132 particular, during the interval between pregnancies. Interpregnancy weight gain has,  
133 however, been associated with gestational hypertensive disease, gestational diabetes  
134 (GDM), caesarean section (CS), fetal macrosomia and even stillbirth (13-16). The  
135 postpartum and interval pregnancy time period therefore may represent a specific  
136 opportunity for targeted public health education, in women from every BMI category to

1  
2  
3 137 prevent movement into a higher BMI category (17). To date, there are paucity of  
4  
5 138 published longitudinal data on interpregnancy weight changes and the impact on both  
6  
7 139 maternal and neonatal outcomes.  
8  
9

10 140

11 141 The objective of this longitudinal study was to determine the median interpregnancy  
12  
13 142 maternal weight change between first and second pregnancies, and second and third  
14  
15 143 pregnancies and to assess the impact of this weight change on pregnancy outcome in a  
16  
17 144 cohort of women with a macrosomic first delivery.  
18  
19

20 145

21  
22  
23 146 **Methods:**

24  
25 147 This is a prospective longitudinal study over three pregnancies. Women were initially  
26  
27 148 recruited to the ROLO study (Randomised cOntrol trial of LOw glycaemic index diet  
28  
29 149 versus no dietary intervention to prevent recurrence of fetal macrosomia) if their first  
30  
31 150 baby weighed over 4.0kg (8). Recruitment to the randomised trial, with institutional  
32  
33 151 ethical approval and maternal written consent, commenced in January 2007 and  
34  
35 152 completed in January 2011. 800 secundigravida women without diabetes, who had  
36  
37 153 previously given birth to a macrosomic baby (> 4.0kg) and were therefore at increased  
38  
39 154 risk of delivering another macrosomic infant (9), were randomised to receive either low  
40  
41 155 glycaemic index (GI) dietary advice or usual antenatal care. Detailed methodology and  
42  
43 156 results of the ROLO study have previously been published (8, 18). In brief; the low GI  
44  
45 157 diet did not impact on birthweight, but maternal benefits were noted in terms of less  
46  
47 158 gestational weight gain (12.2 Kg vs. 13.7Kg,  $p < 0.05$ ) and less glucose intolerance (21%  
48  
49 159 vs. 28%,  $p < 0.05$ ). Low GI dietary advice was given at week 14 of pregnancy and the  
50  
51 160 women in the intervention group were found to have a significantly reduced glycaemic  
52  
53 161 index and glycaemic load following the intervention (8).  
54  
55  
56  
57  
58  
59  
60

1  
2  
3 162 Mothers were then followed prospectively and data collated and anonymised on 280  
4  
5 163 women who delivered two further babies up to 2015. Weight and height were  
6  
7 164 measured accurately at first presentation prior to 18 weeks gestation in each pregnancy  
8  
9 165 and BMI calculated. Relevant descriptive statistics were obtained for the study  
10  
11 166 population.

12  
13  
14 167 The pregnancy outcomes in the second and third pregnancies were analysed separately  
15  
16 168 with respect to the previous interpregnancy period, using absolute weight change. Data  
17  
18 169 were also analysed for both interpregnancy intervals comparing outcomes for those  
19  
20 170 who gained any weight, or those who gained more weight than the median with those  
21  
22 171 who did not, which may be a more convenient definition for clinical practice. The  
23  
24 172 pregnancy outcomes analysed were CS, GDM, recurrent fetal macrosomia, gestational  
25  
26 173 hypertensive disease, neonatal intensive care unit (NICU) admission and stillbirth. We  
27  
28 174 used the Mann-Whitney-U test to evaluate differences in continuous variables between  
29  
30 175 the groups or over time and  $\chi^2$  tests to compare categorical variables between groups.  
31  
32 176 We set statistical significance at  $P < 0.05$  and used SPSS version 23.0 for statistical  
33  
34 177 analysis.

35  
36  
37  
38  
39 178

#### 40 41 179 **Results:**

42  
43 180 Of the initial 800 women recruited to the ROLO study, 280 (35.0%) women delivered a  
44  
45 181 third baby between 2011 and 2015. Of these, the median maternal weight in the first  
46  
47 182 pregnancy was 68.8kg (IQR 62.0,78.5) and the median BMI was 24.9kg/m<sup>2</sup> (IQR  
48  
49 183 22.7,27.3). In total, 11.4% (n=32) of the cohort were obese in the first trimester of the  
50  
51 184 first pregnancy. Table 1 details the demographic data for the cohort in the first  
52  
53 185 trimester of the first, second and third pregnancies respectively.  
54  
55  
56  
57  
58  
59  
60

1  
2  
3 187 Overall, 72.9% (n=204) gained weight between the first and second pregnancy within a  
4  
5 188 median interpregnancy interval of 24 months (IQR 23,35) and the overall median  
6  
7 189 weight change was 2.60kg (IQR -0.28,3.28). 67.5% (n=189) gained weight between the  
8  
9 190 second and third pregnancy within a median interpregnancy interval of 36.0 months  
10  
11 191 (IQR 24,48), and the overall median weight change was 1.70kg (IQR -0.68,4.58). This  
12  
13 192 resulted in a median weight gain from first to third pregnancy of 4.30kg (IQR 0.3,7.8).  
14  
15 193 Overall the rate of obesity rose from 11.4% in first pregnancy to 22.1% by the beginning  
16  
17 194 of the third pregnancy.  
18  
19  
20  
21  
22

23 196 There were no difference in pregnancy outcomes for the second pregnancy (gestational  
24  
25 197 hypertensive disease, GDM, CS , recurrent fetal macrosomia  $\geq$  4kg, NICU admission and  
26  
27 198 stillbirth) in women who gained interpregnancy weight compared with those who did  
28  
29 199 not and those who gained more interpregnancy weight than the median compared with  
30  
31 200 those who did not.  
32  
33  
34  
35  
36

37 202 There was a statistically significant increase in birthweights  $\geq$  4.0kg (54.0% vs. 39.6%  
38  
39 203  $p=0.03$ ) in those women who gained weight between the second and third pregnancies.  
40  
41 204 In those women who gained more interpregnancy weight than the median (1.70kg)  
42  
43 205 between a second and third pregnancy, there was a significant increase in the rate of  
44  
45 206 gestational diabetes (6.5% vs. 1.4%,  $p=0.03$ ). There were no differences in gestational  
46  
47 207 hypertensive disease, CS, NICU admission and stillbirth (Table 2).  
48  
49  
50  
51  
52

53 209 To examine the effect of cumulative weight gain over both interpregnancy intervals, and  
54  
55 210 to control for the effect of maternal age and BMI less than 18 weeks gestation in the  
56  
57 211 index pregnancy on the above results, logistic regression models to predict a  
58  
59  
60

1  
2  
3 212 birthweight  $\geq 4.0$ kg were run. Weight gain between the first and second, second and  
4  
5 213 third and overall between first and third pregnancies had broadly similar effects, with a  
6  
7 214 2-3% higher odds of a high birthweight per kilogram gain, which increased to 3-5%  
8  
9 215 when adjusting for maternal age and BMI. Statistical significance was marginal, but  
10  
11 216 present for weight gain in the earlier interval and between first and third pregnancies  
12  
13  
14 217 (Table 3).  
15  
16  
17  
18

## 19 **Discussion:**

### 20 Main Findings

21 221 This longitudinal study found that women who delivered a macrosomic infant  $\geq 4.0$ kg in  
22  
23 222 their first pregnancy without gestational diabetes gained a median of 2.60kg between a  
24  
25 223 first and second pregnancy and a median of 1.70kg between a second and third  
26  
27 224 pregnancy resulting in a median 4.30kg weight gain from first to third pregnancy. This  
28  
29 225 resulted in increase in obesity rates from 11.4% in first pregnancy to 22.1% in third  
30  
31 226 pregnancy, highlighting the central role pregnancy has in weight gain across the life  
32  
33 227 course. The interpregnancy weight gain between first and second pregnancies did not  
34  
35 228 appear to impact on pregnancy outcome, however interpregnancy weight gain between  
36  
37 229 second and third pregnancies was associated with an increased rate of recurrent fetal  
38  
39 230 macrosomia  $\geq 4.0$ kg. For each kilogram increase in interpregnancy weight, the odds of  
40  
41 231 giving birth to an infant of  $\geq 4.0$ kg increased. Additionally those with a weight gain of  
42  
43 232 more than the median ( $\geq 1.70$ kg) between second and third pregnancies was associated  
44  
45 233 with increased incidence of GDM.  
46  
47  
48  
49  
50  
51

52 235

### 53 236 Interpretation



1  
2  
3 237 One possible explanation for the lack of associations in second pregnancy may arise due  
4  
5 238 to the Hawthorne effect of trial participation in both the intervention and control arms.  
6  
7 239 Another more likely hypothesis could be that weight gain may be cumulative. The  
8  
9 240 median weights at booking visit in the first, second and third pregnancies were 68.8kg,  
10  
11 241 71.3kg and 73.1kg respectively. Is weight gain cumulative so that it is only over a  
12  
13 242 certain level that effects on birthweight and GDM are noted? There are a paucity of  
14  
15 243 longitudinal studies on postpartum weight changes, because these studies are  
16  
17 244 challenging to conduct (19). This longitudinal study adds to the evidence that  
18  
19 245 interpregnancy weight gain causes GDM and macrosomic babies. Many studies relating  
20  
21 246 to interpregnancy weight changes are cross sectional and retrospective in nature.  
22  
23 247 Furthermore, many of these studies use self-reported maternal weight, which can be  
24  
25 248 unreliable and leads to BMI miscategorization (20). High postpartum weight retention  
26  
27 249 is an important contributor to long-term maternal obesity, which has detrimental  
28  
29 250 effects on long-term maternal health (21).

#### 251 Strengths and Limitations in relation to other studies

252 Bogaerts et al. found that in a population of 7,897 women in Belgium, there was an  
253 increase rate of GDM (aOR 2.25, 95% CI 1.33-3.78; P=0.002) in those who had  
254 interpregnancy weight retention of 2 or more BMI units. However, this study used self-  
255 reported prepregnancy weight and no prior information on hypertension and GDM  
256 available (15). A large Swedish retrospective epidemiological study of 151,025 women  
257 who had their first two consecutive births between 1992 and 2001 found that those  
258 who gained 3 or more BMI units between pregnancies compared with those women  
259 whose BMI changed between -1.0 and 0.9 units had an adjusted odds ratio of GDM of  
260 2.09 (1.68-2.61) (13). Wallace et al. (22) conducted a retrospective cohort study of  
261 12,740 women in Aberdeen, Scotland who delivered their first and second children

1  
2  
3 262 between 1986 and 2007. Weight gain of greater than three BMI units was associated  
4  
5 263 with an increase in large for gestational age infants. Jain et al. (23) analysed a  
6  
7 264 population based historical cohort of 10,444 obese women in Missouri who delivered  
8  
9 265 their first infant between 1998-2005. Interpregnancy weight gain was associated with  
10  
11 266 an increased risk of a LGA infant (aOR 1.37; 95% CI, 1.21-1.54).  
12  
13

14 267

15  
16 268 Our study is a prospective longitudinal illustrating that interpregnancy weight gain is  
17  
18 269 associated with recurrent fetal macrosomia in a unique population of women who  
19  
20 270 delivered a macrosomic baby  $\geq 4.0$  kg in their index pregnancy, and that interpregnancy  
21  
22 271 weight gain of greater than the median is associated with an increased rate of GDM.  
23  
24

25 272

26  
27  
28 273 The interpregnancy interval is an important time for diet and lifestyle intervention in  
29  
30 274 women who have delivered a macrosomic infant in their first pregnancy in the  
31  
32 275 prevention of recurrent macrosomia and the development of GDM.  
33  
34

### 35 276 Strengths and Limitations

36  
37 277 This longitudinal study has strengths. Maternal weight and height were measured at  
38  
39 278 booking visit in each pregnancy  $<18$  weeks gestation and BMI calculated accurately,  
40  
41 279 rather than relying on maternal self-reporting. Furthermore, this cohort of women was  
42  
43 280 uniform in that they delivered a first baby weight  $>4.0$ kg and they did not have GDM or  
44  
45 281 hypertensive disorders in the first pregnancy. Data was prospectively collected by an  
46  
47 282 investigator and accurately recorded into an anonymised computerised database.  
48  
49

50 283

51  
52  
53 284 A potential limitation of this study is that we do not have data on women who attended  
54  
55 285 elsewhere for subsequent antenatal care. Another potential limitation is that the  
56  
57 286 interpregnancy interval varied between subjects within this study. Finally, this study  
58  
59  
60

1  
2  
3 287 applies to women who delivered a first baby >4kg, which applies to approximately 15%  
4  
5 288 of our overall primiparous population.  
6

7 289

8  
9  
10 **290 Conclusions:**

11 291 This longitudinal study demonstrates that within this cohort maternal interpregnancy  
12  
13 292 weight change between a second and third pregnancy is associated with an increase in  
14  
15 293 birthweight  $\geq 4.0$ kg. Additionally a gain of more weight than the median (1.70kg) is  
16  
17 294 associated with a higher rate of gestational diabetes. It is important to identify ways for  
18  
19 295 women to maintain a normal weight and BMI throughout her life, particularly between  
20  
21 296 pregnancies. Obstetricians should consider postnatal advice on interval pregnancy  
22  
23 297 weight gain in order to reduce rates of macrosomia and gestational diabetes in future  
24  
25 298 pregnancy in at risk women.  
26  
27  
28  
29

30 299

31  
32 **300 Acknowledgments**

33 301 Nil of note  
34  
35  
36  
37  
38

39 302

40 **303 Contribution to Authorship**

41 304 FMMcA conceived and designed the study. JW contributed to the study design and  
42  
43 305 manuscript preparation. DAC performed the analysis and wrote the manuscript. RS  
44  
45 306 performed analysis. All of the authors reviewed and revised the final version of the  
46  
47 307 manuscript. FMMcA is the guarantor.  
48  
49

50 308

51  
52 **309 Ethical Approval**

53 310 Not applicable  
54  
55  
56  
57  
58  
59  
60

311

1  
2  
3  
4  
5  
6  
7  
8  
9  
10  
11  
12  
13  
14  
15  
16  
17  
18  
19  
20  
21  
22  
23  
24  
25  
26  
27  
28  
29  
30  
31  
32  
33  
34  
35  
36  
37  
38  
39  
40  
41  
42  
43  
44  
45  
46  
47  
48  
49  
50  
51  
52  
53  
54  
55  
56  
57  
58  
59  
60

312 **Funding**

313 This research received no specific grant from any funding agency in the public,  
314 commercial or not-for-profit sectors.

315 **Competing Interests**

316 We have read and understood BMJ policy on declaration of interests and declare that  
317 we have no competing interests.

318

319

320

321

322

323

324

325

326

327

328

329

330

331

332

333

334

335

336

337 **References**

- 338 (1) Ørskou J, Kesmodel U, Henriksen TB, Secher NJ. An increasing proportion of  
339 infants weigh more than 4000 grams at birth. *Acta Obstet Gynecol Scand*. 2001  
340 Oct; 80 (10): 931-6.
- 341 (2) National Maternity Hospital Clinical Report for the Year 2014.
- 342 (3) Walsh JM, McAuliffe FM. Prediction and prevention of the macrosomic fetus. *Eur*  
343 *J Obstet Gynecol Reprod Biol*. 2012 Jun;162(2):125-30
- 344 (4) Boulet SL, Alexander GR, Salihu HM, Pass M. Am J Obstet Gynecol. Macrosomic  
345 births in the united states: determinants, outcomes, and proposed grades of risk.  
346 2003 May;188(5):1372-8.
- 347 (5) Nold JL, Georgieff MK. *Pediatr Clin North Am*. Infants of diabetic mothers. 2004  
348 Jun;51(3):619-37
- 349 (6) Weissmann-Brenner A1, Simchen MJ, Zilberberg E, Kalter A, Weisz B, Achiron R  
350 et al. Maternal and neonatal outcomes of large for gestational age pregnancies.  
351 *Acta Obstet Gynecol Scand*. 2012 Jul;91(7):844-9.
- 352 (7) Boney CM, Verma A, Tucker R, Vohr BR. Metabolic syndrome in childhood:  
353 association with birth weight, maternal obesity, and gestational diabetes  
354 mellitus. *Pediatrics*. 2005 Mar;115(3):e290-6
- 355 (8) Walsh JM, McGowan CA, Mahony R, Foley ME, McAuliffe FM. Low glycaemic index  
356 diet in pregnancy to prevent macrosomia (ROLO study): randomised control  
357 trial. *BMJ*. 2012 Aug 30;345:e5605
- 358 (9) Walsh CA, Mahony RT, Foley ME, Daly L, O'Herlihy C. Recurrence of fetal  
359 macrosomia in non-diabetic pregnancies. *J Obstet Gynaecol*. 2007  
360 May;27(4):374-8.

- 1  
2  
3 361 (10) Abrams BF, Laros RK Jr. Prepregnancy weight, weight gain, and birth  
4  
5 362 weight. *Am J Obstet Gynecol*. 1986 Mar;154(3):503-9.  
6  
7 363 (11) Godoy AC, Nascimento SL, Surita FG. A systematic review and meta-  
8  
9 364 analysis of gestational weight gain recommendations and related outcomes in  
10  
11 365 Brazil. *Clinics (Sao Paulo)*. 2015 Nov;70(11):758-64.  
12  
13  
14 366 (12) Sagedal LR, Øverby NC, Bere E, Torstveit MK, Lohne-Seiler H, Småstuen M  
15  
16 367 et al. Lifestyle intervention to limit gestational weight gain: the Norwegian Fit for  
17  
18 368 Delivery randomised controlled trial. *BJOG*. 2016 Jan 14. doi: 10.1111/1471-  
19  
20 369 0528.13862. [Epub ahead of print]  
21  
22  
23 370 (13) Villamor E, Cnattingius S. Interpregnancy weight change and risk of  
24  
25 371 adverse pregnancy outcomes: a population-based study. *Lancet*. 2006 Sep  
26  
27 372 30;368(9542):1164-70.  
28  
29  
30 373 (14) Paramsothy P, Lin YS, Kernic MA, Foster-Schubert KE. Interpregnancy  
31  
32 374 weight gain and cesarean delivery risk in women with a history of gestational  
33  
34 375 diabetes. *Obstet Gynecol*. 2009 Apr;113(4):817-23.  
35  
36  
37 376 (15) Bogaerts A, Van den Bergh BR, Ameye L, Witters I, Martens E, Timmerman  
38  
39 377 D, Devlieger R. Interpregnancy weight change and risk for adverse perinatal  
40  
41 378 outcome. *Obstet Gynecol*. 2013 Nov;122(5):999-1009  
42  
43  
44 379 (16) Cnattingius S, Villamor E. Weight change between successive pregnancies  
45  
46 380 and risks of stillbirth and infant mortality: a nationwide cohort study. *Lancet*.  
47  
48 381 2016 Feb 6;387(10018):558-65.  
49  
50  
51 382 (17) Walsh JM, Mahony RM, Canty G, Foley ME, McAuliffe FM. Identification of  
52  
53 383 those most likely to benefit from a low-glycaemic index dietary intervention in  
54  
55 384 pregnancy. *Br J Nutr*. 2014 Aug 28;112(4):583-9.  
56  
57  
58  
59  
60

- 1  
2  
3 385 (18) Walsh JM, McGowan CA, Mahony R, Foley ME, McAuliffe FM. Low  
4  
5 386 glycaemic index diet in pregnancy to prevent macrosomia (ROLO study):  
6  
7 387 randomised control trial. *Br Med J*. 2012;345.  
8  
9  
10 388 (19) O'Higgins AC, Doolan A, Mullaney L, Daly N, McCartney D, Turner MJ. The  
11  
12 389 relationship between gestational weight gain and fetal growth: time to take  
13  
14 390 stock? *J Perinat Med* 2013;21:1-7  
15  
16  
17 391 (20) Turner MJ. The measurement of maternal obesity: can we do better? *Clin*  
18  
19 392 *Obes* 2011;1:127-129  
20  
21 393 (21) Gunderson EP. Childbearing and obesity in women: weight before, during,  
22  
23 394 and after pregnancy. *Obstet Gynecol Clin North Am* 2009;36(2):317-332.  
24  
25  
26 395 (22) Wallace JM, Bhattacharya S, Campbell DM, Horgan GW. Inter-pregnancy  
27  
28 396 weight change impacts placental weight and is associated with the risk of  
29  
30 397 adverse pregnancy outcomes in the second pregnancy. *BMC Pregnancy*  
31  
32 398 *Childbirth*. 2014 Jan 22;14:40.  
33  
34  
35 399 (23) Jain AP, Gavard JA, Rice JJ, Catanzaro RB, Artal R, Hopkins SA. The impact  
36  
37 400 of interpregnancy weight change on birthweight in obese women. *Am J Obstet*  
38  
39 401 *Gynecol*. 2013 Mar;208(3):205  
40  
41 402  
42  
43 403  
44  
45 404  
46  
47 405  
48  
49 406  
50  
51 407  
52  
53 408  
54  
55 409  
56  
57  
58  
59  
60

1  
2  
3 410 **Table 1:** Demographics of the cohort at in the first trimester of the first, second and  
4  
5 411 third pregnancies respectively (n=280)  
6  
7  
8 412

|                                | Pregnancy 1      | Pregnancy 2      | Pregnancy 3      |
|--------------------------------|------------------|------------------|------------------|
| Maternal Age (years)           | 29.0 (23.9,32.0) | 31.8 (29.0,34.5) | 34.8 (31.6,37.4) |
| Maternal Weight (kg)           | 68.8 (62.0,78.5) | 71.4 (63.6,81.1) | 73.1 (65.1,84.5) |
| BMI (kg/m <sup>2</sup> )       | 24.9 (22.7,27.3) | 25.7 (23.4,28.8) | 26.0 (23.6,29.3) |
| Birthweight (kg)               | 4.2 (4.07,4.33)  | 4.1 (3.74,4.35)  | 4.0 (3.68,4.36)  |
| Gestational Age (Days)         | 288 (282,292)    | 283 (277,288)    | 280 (273,287)    |
| Obese (≥ 30kg/m <sup>2</sup> ) | 11.4% (n=32)     | 20.0% (n=56)     | 22.1% (n=62)     |

27 413  
28 414  
29 415  
30 416  
31 417  
32 418  
33 419  
34 420  
35 421  
36 422  
37 423  
38 424  
39 425  
40 426  
41 427  
42 428  
43 429  
44 430  
45 431  
46 432  
47 433  
48 434  
49 435  
50 436  
51 437  
52 438  
53 439  
54 440  
55  
56  
57  
58  
59  
60

All values are median with interquartile ranges (25<sup>th</sup> and 75<sup>th</sup>) in hypotheses, except for obesity (demonstrated in absolute numbers and percentages). Maternal weight and body mass index (BMI) were calculated at ≤ 18 weeks gestation.



441 **Table 2:**

442 Pregnancy outcomes for the third pregnancy based on those who gained inter-  
 443 pregnancy weight compared with those who did not and those who gained more inter-  
 444 pregnancy weight than the median compared with those who did not.  
 445  
 446

|                      | <b>Gained interpregnancy weight n=189</b>                | <b>Did not gain interpregnancy weight n=91</b>        | <b>P value</b> |
|----------------------|----------------------------------------------------------|-------------------------------------------------------|----------------|
| CS overall           | 41 (21.7%)                                               | 21 (23.1%)                                            | NS             |
| GDM                  | 9 (4.8%)                                                 | 2 (2.2%)                                              | NS             |
| BW ≥4kg              | 102 (54.0%)                                              | 36 (39.6%)                                            | P=0.03         |
| Hypertensive Disease | 5 (2.6%)                                                 | 2 (2.2%)                                              | NS             |
| NICU                 | 4 (2.1%)                                                 | 2 (2.2%)                                              | NS             |
| Stillbirth           | 1 (0.5%)                                                 | 1 (1.1%)                                              | NS             |
|                      | <b>Gained &gt; 1.70kg inter-pregnancy weight (n=139)</b> | <b>Gained ≤ 1.70kg inter-pregnancy weight (n=141)</b> | <b>P value</b> |
| CS overall           | 28 (20.1%)                                               | 34 (24.1%)                                            | NS             |
| GDM                  | 9 (6.5%)                                                 | 2 (1.4%)                                              | 0.03           |
| BW ≥4kg              | 75 (54.0%)                                               | 63 (44.7%)                                            | NS             |
| Hypertensive Disease | 4 (2.9%)                                                 | 3 (2.1%)                                              | NS             |
| NICU                 | 4 (2.9%)                                                 | 2 (1.4%)                                              | NS             |
| Stillbirth           | 0 (0%)                                                   | 2 (1.4%)                                              | NS             |

447

448

449

450

451

452

453

454

455

456

457

1  
2  
3 458 **Table 3. Effect of weight gain on odds of birthweight  $\geq 4$ kg unadjusted and**  
4  
5 459 **adjusted for maternal age and BMI calculated at less than 18 weeks gestation in**  
6  
7  
8 460 **the index pregnancy**

|                                   | Unadjusted |            |         | Adjusted for maternal age and BMI |            |         |
|-----------------------------------|------------|------------|---------|-----------------------------------|------------|---------|
|                                   | OR         | 95% CI     | p-value | OR                                | 95% CI     | p-value |
| Weight gain from pregnancy 1 to 2 | 1.03       | 0.99, 1.07 | 0.169   | 1.05                              | 1.01, 1.10 | 0.024   |
| Weight gain from pregnancy 2 to 3 | 1.02       | 0.98, 1.06 | 0.243   | 1.03                              | 0.99, 1.08 | 0.107   |
| Weight gain from pregnancy 1 to 3 | 1.03       | 1.00, 1.06 | 0.093   | 1.04                              | 1.01, 1.08 | 0.013   |

461

STROBE 2007 (v4) Statement—Checklist of items that should be included in reports of *cross-sectional studies*

| Section/Topic                | Item # | Recommendation                                                                                                                                                                       | Reported on page # |
|------------------------------|--------|--------------------------------------------------------------------------------------------------------------------------------------------------------------------------------------|--------------------|
| Title and abstract           | 1      | (a) Indicate the study's design with a commonly used term in the title or the abstract                                                                                               | 2                  |
|                              |        | (b) Provide in the abstract an informative and balanced summary of what was done and what was found                                                                                  | 3                  |
| <b>Introduction</b>          |        |                                                                                                                                                                                      |                    |
| Background/rationale         | 2      | Explain the scientific background and rationale for the investigation being reported                                                                                                 | 5                  |
| Objectives                   | 3      | State specific objectives, including any prespecified hypotheses                                                                                                                     | 6                  |
| <b>Methods</b>               |        |                                                                                                                                                                                      |                    |
| Study design                 | 4      | Present key elements of study design early in the paper                                                                                                                              | 6                  |
| Setting                      | 5      | Describe the setting, locations, and relevant dates, including periods of recruitment, exposure, follow-up, and data collection                                                      | 7                  |
| Participants                 | 6      | (a) Give the eligibility criteria, and the sources and methods of selection of participants                                                                                          | 6                  |
| Variables                    | 7      | Clearly define all outcomes, exposures, predictors, potential confounders, and effect modifiers. Give diagnostic criteria, if applicable                                             | 7                  |
| Data sources/<br>measurement | 8*     | For each variable of interest, give sources of data and details of methods of assessment (measurement). Describe comparability of assessment methods if there is more than one group | 7                  |
| Bias                         | 9      | Describe any efforts to address potential sources of bias                                                                                                                            | N/A                |
| Study size                   | 10     | Explain how the study size was arrived at                                                                                                                                            |                    |
| Quantitative variables       | 11     | Explain how quantitative variables were handled in the analyses. If applicable, describe which groupings were chosen and why                                                         | 7                  |
| Statistical methods          | 12     | (a) Describe all statistical methods, including those used to control for confounding                                                                                                | 7                  |
|                              |        | (b) Describe any methods used to examine subgroups and interactions                                                                                                                  | N/A                |
|                              |        | (c) Explain how missing data were addressed                                                                                                                                          | N/A                |
|                              |        | (d) If applicable, describe analytical methods taking account of sampling strategy                                                                                                   | N/A                |
|                              |        | (e) Describe any sensitivity analyses                                                                                                                                                | N/A                |
| <b>Results</b>               |        |                                                                                                                                                                                      |                    |

|                          |     |                                                                                                                                                                                                              |       |
|--------------------------|-----|--------------------------------------------------------------------------------------------------------------------------------------------------------------------------------------------------------------|-------|
| Participants             | 13* | (a) Report numbers of individuals at each stage of study—eg numbers potentially eligible, examined for eligibility, confirmed eligible, included in the study, completing follow-up, and analysed            | 7     |
|                          |     | (b) Give reasons for non-participation at each stage                                                                                                                                                         | N/A   |
|                          |     | (c) Consider use of a flow diagram                                                                                                                                                                           | N/A   |
| Descriptive data         | 14* | (a) Give characteristics of study participants (eg demographic, clinical, social) and information on exposures and potential confounders                                                                     | 7     |
|                          |     | (b) Indicate number of participants with missing data for each variable of interest                                                                                                                          | N/A   |
| Outcome data             | 15* | Report numbers of outcome events or summary measures                                                                                                                                                         | 8     |
| Main results             | 16  | (a) Give unadjusted estimates and, if applicable, confounder-adjusted estimates and their precision (eg, 95% confidence interval). Make clear which confounders were adjusted for and why they were included |       |
|                          |     | (b) Report category boundaries when continuous variables were categorized                                                                                                                                    | 8-9   |
|                          |     | (c) If relevant, consider translating estimates of relative risk into absolute risk for a meaningful time period                                                                                             | N/A   |
| Other analyses           | 17  | Report other analyses done—eg analyses of subgroups and interactions, and sensitivity analyses                                                                                                               | N/A   |
| <b>Discussion</b>        |     |                                                                                                                                                                                                              |       |
| Key results              | 18  | Summarise key results with reference to study objectives                                                                                                                                                     | 9     |
| Limitations              | 19  | Discuss limitations of the study, taking into account sources of potential bias or imprecision. Discuss both direction and magnitude of any potential bias                                                   | 10-11 |
| Interpretation           | 20  | Give a cautious overall interpretation of results considering objectives, limitations, multiplicity of analyses, results from similar studies, and other relevant evidence                                   | 12    |
| Generalisability         | 21  | Discuss the generalisability (external validity) of the study results                                                                                                                                        | 12    |
| <b>Other information</b> |     |                                                                                                                                                                                                              |       |
| Funding                  | 22  | Give the source of funding and the role of the funders for the present study and, if applicable, for the original study on which the present article is based                                                | N/A   |

\*Give information separately for cases and controls in case-control studies and, if applicable, for exposed and unexposed groups in cohort and cross-sectional studies.

**Note:** An Explanation and Elaboration article discusses each checklist item and gives methodological background and published examples of transparent reporting. The STROBE checklist is best used in conjunction with this article (freely available on the Web sites of PLoS Medicine at <http://www.plosmedicine.org/>, Annals of Internal Medicine at <http://www.annals.org/>, and Epidemiology at <http://www.epidem.com/>). Information on the STROBE Initiative is available at [www.strobe-statement.org](http://www.strobe-statement.org).
